# Supplementary material for: The evolution of transcriptional repressors in the Notch signaling pathway: a computational analysis
Source: PubMed Central journal article supplement (PMC6337844; doi:10.1186/s41065-019-0081-0), 2019-01-17
Supplement: 41065_2019_81_MOESM1_ESM.pdf [file 41065_2019_81_MOESM1_ESM.pdf]

# The evolution of transcriptional repressors in the Notch signaling pathway throughout the animal kingdom: a computational analysis

Dieter Maier

## Additional Dataset 1

Gene accession numbers and sequences retrieved from database or predicted from whole genome sequences used for comparisons in this work.

### Suppressor of Hairless Su(H)

*Hydra vulgaris*

**Su(H)** GenBank: [CDG70345.1](#)

*Triops cancriformis*

Triops cancriformis DNA, contig: contig\_1875-19264, whole genome shotgun sequence; Sequence ID: [BAYF01001879.1](#), Length: 19264

```
MFCSEAWRVACRWLVWLGSKPPQOYTIVYVRLALAERSKSPALYVVLQPPPETI PCSQMEV
WEPHRGPPLFRPKEQRLTREAMMRYLQERGMVLVILHAKVAQKSYGNEKRFFCPCPIYLY
GDGWRRRREQLQREATAAGASAAEAEASSQLCAFIGIGNSDQDMQQLDLNGKHYCAAKTLEFI
SDSDKRKHFMLSVMFYGNGQDIGVFHSHKRIKVISKPSKKKQSLKNADLCIASGTRVALFNR
LRSQTVSTRYLHVENNNFHASSTQWGAFTIHLDDSESESEEFVTRDGYIHYGSTVKLVCSV
TGMALPRLIIRKVDKQMAVL DADDPVSQLHKCAFYMKDTERMYLCLSQERI IQFQATPCPKE
PNKEMINDGAAWTIIISTDKAEYQFFEGMGPVRSPTVPVPIVHSLHLNNGGGEVAMLELTGENL
TPNLKVVWFGDVEAETMFRCEE SMLCVVPDISAFRSGWQVVRHPTQVPVSLVRS DGIYATRL
TFTYTPEPGPRPHCPTTDEVLRGSVSTNGSSHMVGGNMHYEHL PQGPTM (545)
```

*Strigamia maritima*

Strigamia maritima strain Brora ctg7180001225943, whole genome shotgun sequence. Sequence ID: [AFFK01015431.1](#), Length: 31215

```
MNEVFLPQGQYDYPPLASTYSREADLWNVNLATYSSAPTCTGATPAPSVTGFYAQATGSNSVSPSSVSLTTLT
PHFADNHPVDLSNSHRGEGGHLDLVRFQSDRVDAYKHANGLSVHIPDHHDATSHMIAGSLTPDPKVNGEHGHQLV
TMSNASQMSLGSIASSLQTPPSPIPTSPVPLDGVHRSHKDQRLTREAMKRYLRERGDQVLVILHAKVAQKSYG
NEKRFFCPCPIYLFQGDGWRRKREQMLHEGETEQGAQLCAFIGIGNSDQDMQQLDLNGKNYCAAKTLYISDSDKR
KHFMLTVKMFYGNEDIGVFHSHKRIKVISKPSKKKQSLKNADLCIASGTKVALFNRLRSQTVSTRYLHVENGTFH
ASSTQWGAFTIHLDDNESESEEFVTRDGYIHYGSTVKLVCSV TGMALPRLIIRKVDKQTALLDADDPVSQLHKC
AFYMKDTERMYLCLSQERI IQFQATPCPKEPNKEMINDGASWTIIISTDKAEYTFCEGMGPVRTLVTPVPVHSLH
LNGGGDVAMLELTGENFTPTLRVWFGDVEAETMYRCQESMLCVVPDISAFRGGWQFVRQPTQVPVSLVRS DGIY
ATGLTFTYTPEPGPRPHCPA TDHILRGGSQSGLDRLPTSPDPALTYNPPHHALTPI
```

## **Hairless H**

*Triops cancriformis*

Predicted from whole genome shotgun sequence Contig\_1325-52010  
(BAYF01001327.1)

MKCCEPPHSQLIMSEEQDIEAGLMKPKIEEPLLQSTAPIVSPTLAKHSEVENNGSCSPFTP  
EPVAEPKPNRSRLKFFFDFGKMVLELSDKKDGEKVSWPVTKKTYWPPPLPGRPLRQESTTSY  
SGNASFSTDQGSYLSDSCLSKSCSLVSDSSVQSSPWQRDTRWKQPAPKRARCQDRTFYMLV  
PKSERSRRCSSHVQYRKPFVLVQLPHCQCKRTTTRPRGAEPTKRRLSLPRMVQKLGERSAMS  
RAAEFSTHSVRIKEEWRPCEIRSAKDFHLTAVLGSPEQSTRKRAWKESDRARSADAYLKKTK  
AQQPVSAALVAAPLALSSNSKGFDKHSSYSIDSLAKDSLNSASANPEVNHGSPFLRTLKAP  
ASSVSPASGSSPSSAAVTLANKVKVNSASPSRNGHSGKDSASTPRHSPRSQVPTPPQDAAGL  
QLPRTSGGGTPRPSYSASPGPRFNPAVLTGLLPRMAGIPGLPPWEMYNPYMTQLLGASPSW  
MSYSWPPPLGALPSAAFGESEGLMMPNNAAPSAIGHKTNGASIAESDNCSSSSSSSSNSRSV  
IVKPSSTSKESTRKSVEDALIQVPLNLSKSRSGESR

*Strigamia maritima*

SMARO13018 from flybase

MLNSFSSSRGLSRAKMPNPNCECESSQNNKRCENNANVQSGNKKRSTDPNECQQPAQSA  
HDFLKKLVHEQKLHAPTLFNNTNELKPENNRGTSSSENDTNGKLSFYLGENGRFILELEHKPG  
GKRRNGGWIQTGKITWMPRPEEEKLINPIKQELKESETSRMCLKNLKRFSSQRETTNACSVV  
LFNFRINRRRDFKHFPRLNAYYLRKAARHPFSIDLFFFSKSEKCKTAPPSTKLKVKRTRKRLN  
DLFRPPEFVNSTADNVKRFVDEVGSVKVKEPDNASLPLPEWYLDPSKSQIPVNEMIGNPRP  
YLPAAPTHYDDKESNVNSMSEPLDLRTNVVRETKRDEWMKREAKEHPGNAFYVGLIPFPLPG  
HGEYSAPSAVQWPVCVSPVVAYAPTVVNSYYYCCCFPLPGCRSNCLCKTEGKQLTSRSSEIP  
KECDCATDLTNACNKKFPIPVAVKSDHQTPGKKRMSETDVRIQC

Predicted from whole genome shotgun sequence Contig\_7180001234497;  
(AFFK01023985.1)

MLNSFSSSRGLSRAKMPNPNCECESSQNNKRCENNANVQSGNKKRSTDPNECQQPAQSA  
HDFLKKLVHEQKLHAPTLFNNTNELKPENNRGTSSSENDTNGKLSFYLDGRFILELEHKPGGK  
RRNGGWIQTGKITWMPRPEEEKLINPIKQELKESETSRMCLKNLKRFSSQRETTNACSVVLF  
NFRINRRRDFKHFPRLNAYYLRKAARHPFSIDLFFFSKSALEDDHDGEQQDSLADKQRHQLK  
HRELFLSRQVETLPATHIRGKCTVTLNETESLLSYLNKDVNLNDFYMEFKCKICFFLCFFR  
THFFIRWFTIPNKRHYWLIKEKSVSVQVTFQFISYFENLLNEAAMLNPLTAAEAIARDRDVS  
VDFDFDLADHVAVQRDFRCEEKFLFLHEKVFHAGRVRFHRHRNVSFALQVAAQFLQPVASLTG  
PLNLRQQFLEIKNK

## **Notch:**

*Hydra vulgaris*

NotchGenBank: ABV68547.1

## **SHARP/MINT**

*Homo sapiens (Human)*

**msx2-interacting protein**

NCBI Reference Sequence: NP\_055816.2

*Bos taurus (Cattle)*

**TPA: spen homolog, transcriptional regulator**, [GenBank: DAA21211.1](#)

*Lipotes vexillifer (chinese dolphin)*

**SPEN** (Protein ID [XP\\_007459340.1](#))

*Manis javanica (Sunda pangolin)*

**spen family transcriptional repressor (SPEN), transcript variant X1, mRNA**  
[XP\\_017521424.1](#)

*Peromyscus maniculatus bairdii (Deer mouse)*

**spen family transcriptional repressor (Spen), transcript variant X2, mRNA**  
[XP\\_015849836.1](#)

*Elephantulus edwardii (Cape elephant shrew)*

**spen family transcriptional repressor (SPEN), mRNA** [XP\\_006883683.1](#)

*Erinaceus europaeus (European hedgehog)*

**spen family transcriptional repressor (SPEN), mRNA** [XP\\_016043917.1](#)

*Alligator mississippiensis*

**spen family transcriptional repressor (SPEN), transcript variant X4, mRNA**  
[XP\\_014453442.1](#)

*Zonotrichia albicollis (White throated sparrow)*

**spen family transcriptional repressor (SPEN), partial mRNA** [XP\\_014129084.1](#)

*Parus major (Great tit)*

**spen family transcriptional repressor (SPEN), transcript variant X2, mRNA**  
[XP\\_015503523.1](#)

## **SHARP/MINT (continued)**

*Haliaeetus leucocephalus* (Bald eagle)

**spen family transcriptional repressor (SPEN), transcript variant X1, mRNA**  
[XP\\_010575514.1](#)

*Danio rerio* (Zebrafish)

**spen family transcriptional repressor (spen), transcript variant X2, mRNA**  
[XP\\_009295192.1](#)

*Rhincodon typus* (Whale shark)

**msx2-interacting protein-like (LOC109926950), partial mRNA** [XP\\_020382431.1](#)

*Callorhinchus milii* (Austalien ghostshark)

**spen family transcriptional repressor (spen), mRNA** [XP\\_007905153.1](#)

*Latimeria chalumnae* (West Indian Ocean coelacanth)

**spen family transcriptional repressor (SPEN), transcript variant X1, mRNA**  
[XP\\_005996344.1](#)

*Manis javanica* (Sunda pangolin)

PREDICTED: *msx2-interacting protein isoform X1*  
NCBI Reference Sequence: [XP\\_017521424.1](#)

*Gadus morhua* (Atlantic cod)

**WGS project CAEA02000000 data, contig: gadMor2\_ctg\_224, whole genome  
shotgun sequence**

Sequence ID: [CAEA020000225.1](#), Length: 169981

*Oncorhynchus kisutch* (coho salmon)

**isolate 150728-3 scaffold02541, whole genome shotgun sequence**

Sequence ID: [MPKV01002541.1](#), Length: 3463492, Number of Matches: 15

*Leucoraja erinacea* (Little skate)

**LER\_WGS\_1\_CONTIG\_2664153, whole genome shotgun sequence**

Sequence ID: [AESE012501079.1](#), Length: 9851 **Not complete.**

## **SHARP/MINT (continued)**

*Crotalus horridus* (Timber rattlesnake)

**isolate 016-059-111 Sequence\_21106\_23757, whole genome shotgun sequence**  
Sequence ID: [LVCR01021106.1](#), Length: 23757 Number of Matches: 10

*Lethenteron camtschaticum* (Arctic lamprey)  
(sequence prediction made with five shotgun sequences)

**contig033099, whole genome shotgun sequence**

Sequence ID: [APJL01092535.1](#), Length: 6973

**contig051046, whole genome shotgun sequence**

Sequence ID: [APJL01092534.1](#), Length: 4466

**contig124466, whole genome shotgun sequence**

Sequence ID: [APJL01137493.1](#), Length: 1523

**contig021404, whole genome shotgun sequence**

Sequence ID: [APJL01091189.1](#), Length: 10023

**contig168045, whole genome shotgun sequence**

Sequence ID: [APJL01173146.1](#), Length: 1055

## **KyoT2:**

*Lipotes vexillifer* (Chinese river dolphin)

**PREDICTED: four and a half LIM domains 1 (FHL1), transcript variant X6, mRNA**  
Sequence ID: [XM\\_007462905.1](#) Length: 633 Number of Matches: 1

*Phascolarctos cinereus* (koala)

**PREDICTED: four and a half LIM domains 1 (FHL1), transcript variant X3, mRNA**  
Sequence ID: [XM\\_020969789.1](#) Length: 611 Number of Matches: 2

*Monodelphis domestica* (Gray short-tailed opossum)

**PREDICTED: four and a half LIM domains 1 (FHL1), transcript variant X1, mRNA**  
Sequence ID: [XM\\_001379142.4](#) Length: 2324 Number of Matches: 5

*Danio rerio* (Zebrafish)

**four and a half LIM domains 1a (fhl1a), mRNA**  
Sequence ID: [NM\\_001007287.1](#) Length: 1435 Number of Matches: 5

*Salmo salar* (Atlantik salmon)

**PREDICTED: Four and a half LIM domains protein 1 (fhl1), transcript variant X1, mRNA;**  
Sequence ID: [XM\\_014199413.1](#) Length: 1496 Number of Matches: 5

*Clupea harengus* (Atlantik herring)

**PREDICTED: four and a half LIM domains 1 (fhl1), mRNA**  
Sequence ID: [XM\\_012841176.1](#) Length: 921 Number of Matches: 5

## **KyoT2 (continued):**

*Alligator mississippiensis*

PREDICTED: **four and a half LIM domains 1 (FHL1), transcript variant X1**, mRNA  
Sequence ID: [XM\\_019492797.1](#) Length: 1577 Number of Matches: 3

*Haliaeetus leucocephalus (Bald eagle)*

PREDICTED: **four and a half LIM domains 1 (FHL1), transcript variant X2**, mRNA  
Sequence ID: [XM\\_010572470.1](#) Length: 980 Number of Matches: 5

*Parus major (Great tit)*

PREDICTED: **four and a half LIM domains 1 (FHL1), transcript variant X4**, mRNA  
Sequence ID: [XM\\_015626478.2](#) Length: 1857 Number of Matches: 4

*Felis catus (Cat)*

PREDICTED: **four and a half LIM domains 1 (FHL1), transcript variant X6**, mRNA  
Sequence ID: [XM\\_019824360.1](#) Length: 2163 Number of Matches: 3 Cat

*Canis lupus (Gray wolf) familiaris*

PREDICTED: **four and a half LIM domains 1 (FHL1), transcript variant X5**, mRNA  
Sequence ID: [XM\\_861215.5](#) Length: 2380 Number of Matches: 5 Dog

*Monodelphis domestica (Gray short-tailed opossum)*

PREDICTED: **four and a half LIM domains 1 (FHL1), transcript variant X1**, mRNA  
Sequence ID: [XM\\_001379142.4](#) Length: 2324 Number of Matches: 5

## **Limpet:**

*Drosophila melanogaster*

**Limpet Lmpt, ID: [FBgn0261565](#) Symbol: Lmpt-PN**

*Musca domestica (Housefly)*

PREDICTED: **four and a half LIM domains protein 2** (LOC101894619), transcript variant X7, mRNA

Sequence ID: [XM\\_005190021.3](#) Length: 2184 Number of Matches: 1

*Anopheles gambiae (mosquito)*

str. PEST **AGAP005400-PA** (AgaP\_AGAP005400) mRNA, complete cds

Sequence ID: [XM\\_315409.4](#) Length: 2251 Number of Matches: 5

str. PEST **AGAP005398-PA** (AgaP\_AGAP005398) mRNA, complete cds

Sequence ID: [XM\\_001237655.2](#) Length: 933 Number of Matches: 4

*Aedes aegypti (mosquito)*

PREDICTED: **four and a half LIM domains protein 2** (LOC5573016), transcript variant X1, mRNA

Sequence ID: [XM\\_021843544.1](#) Length: 3474 Number of Matches: 1

*Tribolium castaneum (red flour beetle)*

EnsemblMetazoa database predicts **two different genes** TC013758\_001 (encoding PET and one LIM domain) and TC013756\_002 (encoding three LIM domains) in close neighborhood.

PREDICTED: **four and a half LIM domains protein 2** (LOC661300), transcript variant X3, mRNA

Sequence ID: [XM\\_970928.4](#) Length: 2703 Number of Matches: 1

This prediction in NCBI corresponds my own annotation

*Apis dorsata (Giant honey bee)*

PREDICTED: **four and a half LIM domains protein 3-like** (LOC102677765), transcript variant X2, mRNA

Sequence ID: [XM\\_006621240.1](#) Length: 2209 Number of Matches: 1

## **Prickle (alignments):**

*Hydra vulgaris* (fresh water polyp)

strain 105 ctg1101284810209, whole genome shotgun sequence  
Sequence ID: [ABRM01028485.1](#) Length: 11387 Number of Matches: 5

PREDICTED: **Hydra vulgaris prickles-like protein 3** (LOC100212931), transcript variant X2, mRNA  
Sequence ID: [XM\\_002158307.3](#) Length: 2181 Number of Matches: 1

*Homo sapiens* (Human)

**prickle planar cell polarity protein 2 (PRICKLE2)**, mRNA  
Sequence ID: [NM\\_198859.3](#) Length: 8322 Number of Matches: 1

*Drosophila melanogaster*

**Prickle Pk, ID: [FBpp0088113](#) Symbol: pk-PA**

## **Prickle (phylogeny):**

Chordata: *Homo sapiens* (man)  
PRICKLE2, mRNA, Sequence ID: [NM\\_198859.3](#)

Hemichordata: *Saccoglossus kowalevskii* (acorn worm)  
prickle2-like protein mRNA (partial) Sequence ID: [GU224218.1](#)

Phoronids: *Phoronis australis* (horseshoe worm)  
whole genome shotgun sequence; Sequence ID: [NMRA01000005.1](#)

Brachiopoda: *Lingula anatina*  
prickle planar cell polarity protein 3-A transcript variant X3, mRNA, Sequence ID:  
[XM\\_013549311.1](#)

Echinodermata: *Strongylocentrotus purpuratus* (purple sea urchin)  
prickle-like protein 3 transcript variant X4, mRNA, Sequence ID: [XM\\_011685458.1](#)

**Insecta:** *Drosophila melanogaster* (vinegar fly)  
Prickle Pk, Sequence ID: [FBpp0088113](#)

**Myriapoda:** *Strigamia maritima*  
whole genome shotgun sequence, Sequence ID: [AFFK01019870.1](#)



## **Prickle (phylogeny) continued:**

**Chelicerata:** *Centruroides sculpturatus* (bark scorpion)  
prickle planar cell polarity protein 3-like, transcript variant X3, mRNA, Sequence ID: [XM\\_023383390.1](#)

**Annelida:** *Helobdella robusta* (leech)  
hypothetical protein partial mRNA, Sequence ID: [XM\\_009015555.1](#)

**Nematoda:** *Caenorhabditis elegans* (nematode worm)  
Prkl-1 coding sequence, Sequence ID: [NM\\_171372.2](#)

**Mollusca:** *Lottia gigantea* (owl limpet)  
hypothetical protein partial mRNA, Sequence ID: [XM\\_009055231.1](#)

**Rotifera:** *Brachionus plicatilis* (wheel animal)  
whole genome shotgun sequence, Sequence ID: [REGN01008705.1](#)

**Nemertea:** *Notospermus geniculatus* (ribbon worm)  
whole genome shotgun sequence, Sequence ID: [NMRB01001797.1](#)

**Platyhelminthes:** *Schistosoma mansoni* (blood fluke)  
LIMPET mRNA, complete cds; Sequence ID: [EU436753.1](#)

**Ctenophera:** *Mnemiopsis leidyi* (warty comb jelly)  
LIM protein mRNA, complete cds, Sequence ID: [JN615190.1](#)

**Porifera:** *Amphimedon queenslandica* (sponge)  
testin-like, mRNA, Sequence ID: [XM\\_003387784.2](#)  
testin-like, transcript variant X1, mRNA, Sequence ID: [XM\\_011406892.2](#)  
testin-like, transcript variant X2, mRNA Sequence ID: [XM\\_019998858.1](#)

**Placozoans:** *Trichoplax adhaerens*  
hypothetical protein, partial mRNA, Sequence ID: [XM\\_002112366.1](#)
