# Supplementary material for: The evolution of transcriptional repressors in the Notch signaling pathway: a computational analysis
Source: PubMed Central journal article supplement (PMC6337844; doi:10.1186/s41065-019-0081-0), 2019-01-17
Supplement: 41065_2019_81_MOESM2_ESM.pdf [file 41065_2019_81_MOESM2_ESM.pdf]

# The evolution of transcriptional repressors in the Notch signaling pathway throughout the animal kingdom: a computational analysis

Dieter Maier

## Additional Figure S1 Structure prediction of the *StmaH* gene

a

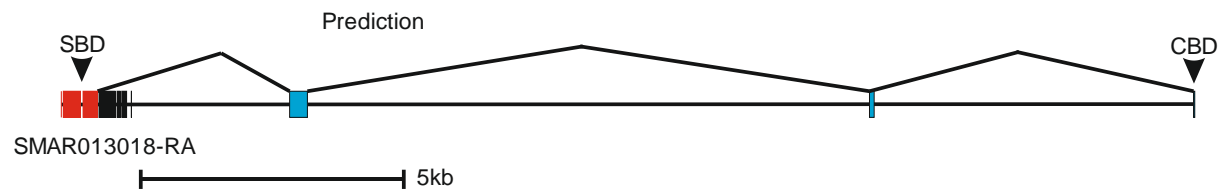

b

```

GTTTTACCCGCCATCGAAATGTCTCGTTTCGCTTTGCAAGTTGCCGCTCAATTCCTGCAAC
23341 -----+-----+-----+-----+-----+-----+-----+ 23400
CAAAGTGGCGGTAGCTTTACAGAGCAAGCGAAACGTTCAACGGCGAGTTAAGGACGTTG

a   V F T A I E M S R S L C K L P L N S C N -
b   F S P P S K C L V R F A S C R S I P A T -
c   F H R H R N V S F A L Q V A A Q F L Q P -

CGGTTGCATCGCTGACCGGTCCGCTGAACTTGCGCCAGCAATTCCTAGAAATAAAAAATA
23401 -----+-----+-----+-----+-----+-----+ 23460
GCCAACGTAGCGACTGGCCAGGCGACTTGAACGCGGTCGTTAAGGATCTTTATTTTTTAT

a   R L H R * P V R * T C A S N S * K * K I -
b   G C I A D R S A E L A P A I P R N K K * -
c   V A S L T G F L N L R Q Q F L E I K N K -

AAAAACAAAAAAACAAATAAAAATCAAATAAAAATCACTTTTTATCACTTTACTTTG
23461 -----+-----+-----+-----+-----+-----+ 23520
TTTTTGTTTTTTTTTTGTTTATTTTTTAGTTTTATTTTTTAGTGAAAAATAGTGAAATGAAAC

a   K N K K K Q I K I K I K I T F Y H F T L -
b   K T K K N K * K S K * K S L F I T L L C -
c   K Q K K T N K N Q N K N H F L S L Y F A -

```

a) Structure prediction for the *StmaH* locus based on sequence analysis of contig 7180001234497 of the whole genome shotgun sequence (ID: AFFK01023985.1, length 39743) for similarities. Red and black boxes depict exons predicted by OrthoDB (flybase), encoding the SMARO123018-TA protein with the potential Su(H) binding domain (SBD, arrowhead). According to my prediction, *StmaH* contains the red plus the blue exons, skipping the black ones. The prediction is based on open reading frame encoding a highly basic protein with potential NLS and derived GBD, taking GT/AG rule for exon/intron boundaries into account. The last predicted exon is roughly 22 kb downstream; it contains a well conserved CtBP binding motif (CBD), however, no suitable stop codon.

b) 3' genomic sequence of the last predicted *StmaH* exon. In red the predicted open reading frame ending with a potential CtBP interacting motif (highlighted in red). The sequence downstream is extremely AT rich, which is a sign of non-coding sequences. Stop codons are present in reading frames a and b (marked in blue), or could occur 2-3 codons downstream of the CBD in case of C/T misreading.
